# Supplementary material for: Childhood Malnutrition and Association of Lean Mass with Metabolome and Hormone Profile in Later Life
Source: Nutrients. 2020 Nov 23;12(11):3593. doi: 10.3390/nu12113593 (PMC7700560; doi:10.3390/nu12113593)
Supplement: Supplementary file 1 [file nutrients-12-03593-s001.xlsx]

## Sheet: Suppl Table 1
Supplementary Table 1. Associations between individual metabolites and hormones with lean mass adjusted for age, sex, HIV status, and early life malnutrition
Feature	Partial coefficient (β)	pVal	FDRpVal
Amino Acids and derivatives
Tryptophan	0.0791103	2.08e-06	0.000176614
Tyrosine	0.0571323	0.000596409	0.0126737
Citrulline	0.0522066	0.00307583	0.0402224
Putrescine	-0.0437028	0.00908531	0.0702047
Threonine	0.0433392	0.0123431	0.0855598
Glutamine	0.0394478	0.0177893	0.108007
Glycine	0.0368136	0.0263187	0.127834
trans OH-Proline	0.0354775	0.0328735	0.15104
Glutamic acid	-0.0380725	0.0379703	0.161374
Asparagine	0.033683	0.0488156	0.192992
Lysine	0.0325314	0.0596934	0.212012
Taurine	-0.0280699	0.0968915	0.270025
Serine	0.0265285	0.114801	0.2949
Leucine	0.0226359	0.185411	0.369322
Ornithine	0.0218912	0.194521	0.37578
Kynurenine	0.0210456	0.204937	0.387103
Spermidine	-0.0211154	0.210607	0.389165
Methionine Sulfoxide	-0.0209801	0.216078	0.390073
Spermine	-0.0209379	0.217982	0.390073
Serotonin	-0.0153561	0.372355	0.565182
Histidine	0.0145236	0.388456	0.57424
Isoleucine	0.0132665	0.436381	0.599763
Proline	0.0116823	0.487856	0.637966
Acetyl ornithine	-0.011221	0.514807	0.668071
Phenylalanine	0.0107774	0.5229	0.673432
Aspartic acid	-0.0100754	0.54734	0.689243
Alanine	0.00937207	0.587738	0.718816
alpha-aminoadipic acid	0.0091541	0.587444	0.718816
Asymmetric Dimethylarginine	0.00683372	0.684484	0.783151
total Dimethylarginine	-0.0032659	0.848848	0.864096
Acylcarnitines
C18	-0.0543986	0.00114854	0.0216947
C18:1	-0.050398	0.00391188	0.0475014
C12:1	-0.043	0.00906396	0.0702047
C16	-0.0476353	0.00674035	0.0702047
C7:DC	-0.0439092	0.00779976	0.0702047
C14:1	-0.0387266	0.0202093	0.11452
C2	-0.0387418	0.0210955	0.115685
C12	-0.0347758	0.0351767	0.153334
C6/C4:1-DC	-0.0323931	0.0517731	0.200033
C5	0.0308576	0.0636156	0.218611
C14	-0.0291117	0.0809312	0.254783
C14:2	-0.0266578	0.110829	0.289861
C8	-0.0267682	0.109138	0.289861
C3:1	-0.0261816	0.117852	0.2949
C14:1-OH	-0.0251614	0.131417	0.319156
C18:2	-0.0263518	0.130712	0.319156
C5:1	-0.0251023	0.138053	0.325959
C5:1-DC	-0.0242557	0.147014	0.333231
C16:2	-0.0238768	0.153415	0.338709
C10	-0.0217778	0.192222	0.375606
C10:1	-0.01403	0.40546	0.594209
C0	0.0132249	0.435824	0.599763
C3	0.00604636	0.723222	0.797595
C3:DC/C4:OH	-0.00549725	0.742775	0.804279
C4	-0.00393692	0.813901	0.843678
C10:2	0.00157679	0.926897	0.926897
Lysophosphatidylcholines
lysoPC a C18:2	0.0388009	0.0191902	0.112494
lysoPC a C17:0	0.013554	0.421489	0.599763
lysoPC a C18:0	0.0138205	0.419364	0.599763
lysoPC a C20:4	0.0136122	0.425701	0.599763
lysoPC a C28:1	-0.0125403	0.452475	0.608694
lysoPC a C28:0	-0.010231	0.542105	0.687745
lysoPC a C16:1	-0.00826626	0.641373	0.756395
lysoPC a C16:0	0.00682407	0.690545	0.783151
lysoPC a C20:3	0.0056091	0.751371	0.808437
lysoPC a C26:0	-0.0046583	0.780881	0.824532
lysoPC a C18:1	-0.00376213	0.82807	0.848024
Phosphatidylcholines
PC ae C34:1	-0.0652151	7.37e-05	0.00417608
PC aa C32:0	-0.0603615	0.00020072	0.00578675
PC aa C34:1	-0.0619998	0.000180433	0.00578675
PC aa C36:1	-0.0638062	0.000204238	0.00578675
PC aa C32:1	-0.0580358	0.000550878	0.0126737
PC ae C34:0	-0.0515829	0.0017903	0.0270524
PC ae C38:5	-0.0524412	0.00190958	0.0270524
PC ae C42:5	-0.0457776	0.00533159	0.0604246
PC ae C32:1	-0.0436441	0.00790434	0.0702047
PC ae C36:4	-0.0442677	0.00775725	0.0702047
PC ae C40:5	-0.043928	0.00888928	0.0702047
PC ae C44:5	-0.0421946	0.0111923	0.0827257
PC ae C38:4	-0.0420771	0.0125823	0.0855598
PC aa C30:0	-0.04067	0.0141008	0.0921975
PC ae C36:3	-0.040071	0.0171135	0.107752
PC ae C36:1	-0.0376323	0.023475	0.120932
PC ae C44:6	-0.038299	0.0228242	0.120932
PC aa C34:3	-0.0359192	0.0318732	0.150512
PC aa C42:0	-0.0333081	0.0469234	0.190749
PC ae C36:0	-0.031836	0.0547849	0.206965
PC aa C36:2	-0.0324855	0.0590114	0.212012
PC ae C36:2	-0.031851	0.0598621	0.212012
PC ae C40:4	-0.031026	0.0642975	0.218611
PC ae C40:6	-0.031339	0.0681416	0.227139
PC aa C34:2	-0.0303587	0.0705575	0.230669
PC ae C36:5	-0.0296385	0.0777971	0.249538
PC ae C42:4	-0.028732	0.0860824	0.261322
PC aa C36:5	-0.0284723	0.0889452	0.26225
PC aa C42:5	-0.0287104	0.0895973	0.26225
PC ae C34:2	-0.0269881	0.105858	0.285647
PC aa C40:5	-0.0279289	0.11796	0.2949
PC ae C44:4	-0.0253571	0.133519	0.319693
PC aa C40:3	-0.0249453	0.140878	0.328072
PC aa C36:3	-0.0245789	0.151443	0.338709
PC ae C32:2	-0.0229429	0.16672	0.363363
PC aa C40:4	-0.0244119	0.17158	0.369222
PC aa C38:0	-0.022951	0.186834	0.369322
PC aa C38:3	-0.0241124	0.182444	0.369322
PC aa C42:1	-0.0228197	0.183657	0.369322
PC ae C38:3	-0.0228392	0.178465	0.369322
PC ae C38:6	-0.0228181	0.178757	0.369322
PC ae C42:2	-0.0213254	0.200429	0.382842
PC aa C38:5	-0.0216935	0.207792	0.388183
PC aa C36:4	-0.0209692	0.21446	0.390073
PC ae C34:3	0.0197911	0.248326	0.435211
PC ae C40:3	-0.0189315	0.261941	0.445091
PC ae C42:3	-0.0187062	0.262423	0.445091
PC aa C32:2	-0.0195786	0.269022	0.44837
PC ae C38:2	-0.0187028	0.27347	0.451358
PC ae C44:3	-0.0171591	0.302383	0.489572
PC ae C38:1	-0.0169784	0.313064	0.502084
PC ae C40:2	-0.0167949	0.321961	0.511526
PC aa C28:1	-0.0161743	0.33129	0.521475
PC aa C42:6	-0.0153291	0.370342	0.565182
PC ae C40:1	0.0150466	0.37166	0.565182
PC ae C30:1	-0.0149776	0.376375	0.566228
PC ae C42:1	0.0134596	0.435499	0.599763
PC ae C30:0	-0.0125453	0.45473	0.608694
PC aa C38:4	-0.0103539	0.554468	0.693085
PC aa C34:4	-0.00978054	0.569207	0.706315
PC aa C42:2	-0.00890434	0.602771	0.731936
PC aa C38:1	0.00847234	0.617572	0.738783
PC aa C40:6	-0.00850108	0.621447	0.738783
PC aa C24:0	0.00763605	0.64961	0.756395
PC ae C42:0	0.00787234	0.647143	0.756395
PC ae C38:0	-0.00713003	0.675826	0.781567
PC aa C40:1	-0.00667973	0.695622	0.783151
PC aa C42:4	-0.00622119	0.711555	0.795818
PC aa C32:3	-0.00602257	0.725938	0.797595
PC aa C36:0	-0.00594153	0.72769	0.797595
PC aa C36:6	0.00482514	0.780029	0.824532
PC aa C38:6	0.00298666	0.863908	0.874193
PC aa C40:2	-0.00188975	0.911219	0.916611
Sphingomyelins
SM C18:0	-0.0385147	0.0247997	0.123999
SM C24:1	-0.0339061	0.0471261	0.190749
SM C16:0	-0.0294562	0.0856343	0.261322
SM C26:1	-0.0198393	0.237153	0.419958
SM C20:2	-0.0181726	0.301786	0.489572
SM C18:1	-0.012351	0.475744	0.631847
SM C22:3	-0.0124299	0.485656	0.637966
SM OH C16:1	-0.0106773	0.528953	0.676106
SM OH C22:1	-0.00883041	0.609745	0.735153
SM C26:0	-0.00661655	0.695562	0.783151
SM C24:0	-0.00587722	0.731911	0.797595
SM OH C22:2	0.00500058	0.771892	0.824532
SM C16:1	0.00442911	0.797139	0.831725
SM OH C14:1	-0.00433566	0.797478	0.831725
SM OH C24:1	-0.00380305	0.823483	0.848024
Hormone and protein measurements
IGF1	0.125527	3.68e-11	6.26e-09
FGF21	-0.0545571	0.00160496	0.0270524
FGF23	-0.0349472	0.0345926	0.153334
TNF	-0.0283713	0.0910162	0.26225
Vitamin D receptor	-0.0284863	0.0965692	0.270025
LPTN	0.0295242	0.103911	0.284918
NGF	-0.024555	0.146141	0.333231
ANGPLT4	-0.0224238	0.183586	0.369322
IL8	-0.0190623	0.253783	0.440236
IL6	-0.018657	0.264436	0.445091
Vitamin A Retinol Binding Protein	-0.0152854	0.363009	0.565182
Vitamin D Binding Protein	-0.0148571	0.383188	0.571421
ANGPLT3	-0.013632	0.41613	0.599763
Human Growth Hormone	-0.0134062	0.437474	0.599763
MCP1	0.0129806	0.447802	0.608694

## Sheet: Suppl Table 2
Supplementary Table 2. Statistical estimates for path analysis
Regressions:
		Estimate	Std.Err	z-value	P(>|z|)
Tryptophan	~
	chrosam	-0.156	0.063	-2.471	0.013
	age	0.001	0.001	0.437	0.662
	sex	0.117	0.063	1.863	0.063
	hiv	-0.016	0.038	-0.416	0.677
Lean Mass Index	~
	Tryptophan	0.186	0.042	4.401	<0.001
	FGF21	-0.02	0.012	-1.723	0.085
	chrosam	-0.076	0.031	-2.459	0.014
	age	0.008	0.001	13.335	<0.001
	sex	-0.005	0.031	-0.155	0.877
	hiv	-0.017	0.019	-0.932	0.351
FGF21	~
	Tryptophan	-1.217	0.273	-4.457	<0.001
	age	0.005	0.004	1.242	0.214
	sex	-0.581	0.214	-2.722	0.006
	hiv	-0.198	0.127	-1.554	0.12
Variances:
	Estimate	Std.Err	z-value	P(>|z|)
Tryptophan	0.138	0.016	8.544	<0.001
Lean Mass Index	0.032	0.004	8.544	<0.001
FGF21	1.565	0.183	8.544	<0.001
R-Squared (variance explained)
	Estimate
Tryptophan	0.066
lmi	0.617
FGF21	0.188
Model validity indices
CFI	0.996
TLI	0.947
AIC	549.013
BIC	599.734
adj BIC	545.939
RMSEA	0.064	[0.00, 0.24]	p = 0.287
SRMR	0.017
